# Supplementary material
Source: MDPI journal article supplement (https://www.mdpi.com/2079-9284/8/1/13)
Supplement: s1 [file s1]

## Sheet: Sheet1
							Positive mode					Negative mode
							Theorical ionization		Experimental			Theorical ionization				Experimental data
Species	Compartment	Metabolite	#	Chemical family	CAS number	Molecular Formula	[M+H]+	[M+Na]+	ESI-MS	FAB-MS	FD-MS	[M-H]-	[M+Na-2H]-	[M-2H]-	[M+HCOO]-	ESI-MS	Product ions (FAB/MS)	UV l nm (log e)	Ref
Fagraea blumei	stem-bark	blumeoside A	1	Iridoid	194657-26-6	C24H28O15	557.151	579.133				555.135	577.117	277.064	601.14	576.9 ([M+Na-2H]-), 554.9 ([M-H]-)	555 ([M-H]-), 539, 375 ([adoxosidic acid-H]-)	220 (4.42), 250 sh, 362 (3.64)	[13]
		blumeoside B	4	Iridoid	194657-30-2	C40H50O23	899.282	921.264				897.266	919.248	448.13	943.272		897, 539	≈ 3	[13]
		blumeoside C	3	Iridoid	194657-28-8	C24H28O14	541.156	563.138				539.14	561.122	269.067	585.146		539 ([M-H]-)	215 (4.21), 240 (3.98), 323 (3.36)	[13]
		blumeoside D	2	Iridoid	194657-27-7	C40H50O24	915.277	937.259				913.261	935.243	456.127	959.267		913 ([M-H]-), 555 ([(blumeoside A)-H]-)	222 (4.25), 251 (3.68), 371 (3.43)	[13]
		di-O-methylcrenatin	5	Phenolic	64121-98-8	C15H22O9	347.134	369.116				345.119	367.101	-	391.124				[13,29]
		swertisin	6	Flavonoid	6991-10-2	C22H22O10	447.129	469.111				445.113	467.095	-	491.119				[13]
Fagraea gracilipes	heartwood	methyl p-coumarate	1	Phenolic	3943-97-3	C10H10O3	179.071	201.053				177.055	199.037	-	223.061				[14]
		p-coumaric acid	1b	Phenolic	7400-08-0	C9H8O3	165.055	187.037				163.04	185.021	-	209.045				[14]
		methyl caffeate	2	Phenolic	3843-74-1	C10H10O4	195.066	217.048				193.05	215.032	-	239.056				[14]
		caffeic acid	2b	Phenolic	331-39-5	C9H8O4	181.05	203.032				179.034	201.016	-	225.04				[14]
		methyl sinapate	3	Phenolic	20733-94-2	C12H14O5	239.092	261.074				237.076	259.058	-	283.082			≈ 11	[14]
		sinapic acid	3b	Phenolic	530-59-6	C11H12O5	225.076	247.058				223.061	245.043	-	269.066				[14]
		sweroside	4	Iridoid	14215-86-2	C16H22O9	359.134	381.116				-	-	-	403.124			245 (3.97)	[14]	see Hachenbach H, Renner C, Addae-mensah I 1982 Planta medica 46, 88; vab Beek TA, Lankhorst PP, Verpoorte R and Barheim Svendsen A (1982) ibid, 44, 30
		3'-O-sinapoyl sweroside	5	Phenolic Iridoid	130756-27-3	C27H32O13	565.192	587.174			587 (M++Na), 565 (M++1), 564 (M+)	563.176	585.158	-	609.182			241 (4.43), 329 (4.32)	[14]
		methyl syringate a-L-rhamnoside	6	Phenolic	130774-07-1	C16H22O9	359.134	381.116			358 (M+), 211, 147	-	-	-	403.124			215 (4.52), 266 (4.05)	[14]
		syringate a-L-rhamnoside	6b	Phenolic	1303579-12-5	C15H20O9	345.119	367.101				343.103	365.085	-	389.108			215 (4.52), 266 (4.05)	[14]
		(Z)-5-ethylidene-3,4,5,6-tetrahydro-trans-6,8-dimethoxy-1H,8H-pyrano-[3,4-c]pyran-1-one	7		130756-28-4 130853-80-4	C12H16O5	241.108	263.09				-	-	-	285.097			272 (4.31)	[14]
		(Z)-5-ethylidene-3,4,5,6-tetrahydro-cis-6,8-dimethoxy-1H,8H-pyrano-[3,4-c]pyran-1-one epimer	8		130756-28-4 130853-80-4	C12H16O5	241.108	263.09				-	-	-	285.097			271 (4.23)	[14]
		Swermirin	9	Iridoid	93236-37-4	C10H10O4	195.066	217.048				-	-	-	239.056				[14]
		-	10		-	C10H12O5	213.076	235.058				-	-	-	257.066				[14]
		3-O-sinapoyl D-glucose	11	Phenolic	1614235-50-5 149998-27-6 86420-35-1 14364-09-1 78185-48-5	C17H22O10	387.129	409.111			386 (M+), 409 (M++Na), 224 (sinapic acid)	-	-	-	431.119			224 (4.22), 237 (4.21), 328 (4.26)	[14]
Fagraea ceilanica	bark	scopoletin	1	Phenolic	92-61-5	C10H8O4	193.05	215.032				191.034	-	-	237.04			229, 252, 296, 345	[15]
Fagraea fragrans	leaves	swertiamarin	1, 4	Iridoid	17388-39-5	C16H22O10	375.129	397.111		375.1320 [M+H]+								237 (3.98)	[16,17]	Ando, 2007
Fagraea fragrans	bark	fagraldehyde	1	Iridoid	1078719-64-8	C10H8O4	193.05	215.032	91 (15), 119 (100), 147 (27), 175 (32), 193 (82)			-	-	-	237.04			205 (3.20), 241 (3.27), 368 (3.45)	[17,19]
		gentiopicroside	2	Iridoid	20831-76-9	C16H20O9	357.119	379.101				-	-	-	401.108				[17]
		sweroside	3	Iridoid	14215-86-2	C16H22O9	359.134	381.116				-	-	-	403.124				[17,29]
Fagraea racemosa	roots	(+)-pinoresinol	1	Lignan	487-36-5	C20H22O6	359.149	381.131	358.1416 [M]+ (ESI?) 358 (29), 327 (5), 205 (14), 163 (25), 151 (61), 137 (100), 131 (25)	397.1048 [M+K]+ 358.1415 [M]+ 359.1466 [M+H]+		357.134	379.116	178.064	403.139			230(4,17), 280 (3,82)	[18,19, 29]	Ling-gen, 1982; Ando, 2007
		(+)-epipinoresinol	2	Lignan	24404-50-0	C20H22O6	359.149	381.131	137 (60), 151 (100), 163 (19), 205 (11), 256 (11), 284 (4), 327 (2), 358 (25)			357.134	379.116	178.064	403.139			232 (4.11), 282 (3.73), 288 (sh,3.64)	[18]
		(+)-lariciresinol	3	Lignan	27003-73-2	C20H24O6	361.165	383.147	360 [M]+			359.149	381.131	179.071	405.155			231 (4.11), 282 (3.76), 287 (sh, 3.71)	[18]
		syringaldehyde	4	Phenolic	134-96-3	C9H10O4	183.066	205.048	182.0579 [M]+			181.05	203.032	90.0217	227.056				[18,19]	Pettit 2009
		7,8-dihydro-7-oxy-coniferyl alcohol	5	Phenolic	2196-18-1	C10H12O4	197.081	219.063	77 (96), 108 (100), 123 (96), 137 (71), 153 (99), 196 (95, [M]+)	197.0808 [M+H]+		195.066	217.048	97.0295	241.071			231, 277, 305	[18]
		(+)-isolariciresinol	6	Lignan	548-29-8	C20H24O6	361.165	383.147	360 [M]+			359.149	381.131	179.071	405.155			230 (sh, 4.06), 284 (3.76)	[18]
Fagraea fragrans	stem bark	6-Methyl-1-oxo-4,4a,5,6-tetrahydropyrano[3,4-c]pyran-5-carboxylic acid	1	Iridoid	1876482-05-1	C10H12O5	213.076	235.058	212.0687 [M]+ 166 (93), 167 (17), 175 (13), 193 (49), 211 (100), 212 (16)									203 (3.89), 247 (4.13)	[19]
		epi-Swermacrolactone C	2	Iridoid	1876482-06-2	C10H14O4	199.097	221.079	198.0887 [M]+ 79 (78), 80 (16), 95 (39), 124 (100), 125 (82), 166 (69), 167 (13), 179 (28), 197 (24), 198 (7)									201 (3.47), 247 (3.4)	[19]
		5-Ethylidene-8-methoxy-4,5,6,8-tetrahydropyrano[3,4-c]pyran-1-one	3	Iridoid	1876482-07-3	C11H14O4	211.097	233.079	210.0877 [M]+ 96 (19), 120 (89), 151 (18), 150 (62), 166 (69), 182 (10), 194 (76), 194 (76), 195 (13), 210 (5),									273 (3.97)	[19]
		5-formylisochromen-1-one (fraganal)	4	Coumarin	1876482-08-4	C10H6O3	175.04	197.021	117 (100), 145 (53), 173 (92), 174 (10)									225 (3.00), 243 (2.83), 254 (2.57), 264 (2.25), 275 (2.11)	[19]
		bifraganal	5	Coumarin	1883829-05-7	C20H12O6	349.071	371.053	348.0621 [M]+ 118 (65), 146 (45), 174 (100), 348 (1)									202 (3.01)	[19]
		(-)-boonein	6	Iridoid	1883829-06-8	C9H14O3	171.102	193.084	170.0942 [M]+ 98 (100), 152 (5), 169 (4), 170 (2)									225 (3.43)	[19]
		30-oxotriacontyl (E)-ferulate	7	Phenolic	1876482-09-5	C40H68O5	629.514	651.496	629.5140 [M+H]+ 176 (100), 193 (48), 599 (39), 627 (56), 628 (25)									216 (3.69), 242 (2.80), 294 (2.79), 325 (2.98)	[19]
		(-)-mellein	8	Coumarin	480-33-1	C10H10O3	179.071	201.053	178.0651 [M]+ [M+Na]+ 201.0522									243, 311	[19]
		swermacrolactone C	9	Iridoid	1605307-12-7	C10H14O4	199.097	221.079	199.0975 [M+H]+									240 (3.49)	[19]	Wang 2013
		nonacosyl (E)-ferulate		Phenolic	353300-35-3	C39H68O4	601.52	623.502											[19]	Islam, 2007
		vanillin		Phenolic	121-33-5	C8H8O3	153.055	175.037	153.054 [M+H]+ 39 (1), 75 (100), 93 (61), 110 (7), 125 (3)									279 (4.01), 309 (4.02)	[19]	Pubchem; Kwon,2001
		erythrocentaurin		Coumarin	50276-98-7	C10H8O3	177.055	199.037	78, 90, 105, 119, 148	177.0537 [M + H]+								224 (4.53), 241 (4.16), 295 (3.32)	[19]	Wang,2009; Ando, 2007
		4-hydroxy-3-methoxy-trans-cinnamaldehyde		Phenylpropanoid	20649-42-7	C10H10O3	179.07	201.052	179.0700 [M+H]+ 77 (34), 84 (35), 107 (44), 135 (68), 147 (60), 161 (35), 178 (100)	(IT) 179.0703 [M+H]+		177.056				177.0549 [M-H]-		302 (sh), 333	[19]	Kwon, 2001
		(+)-monocerin		Coumarin	30270-60-1	C16H20O6	309.134	331.116	308.1 [M]+ 41.1, 81.1, 148.0, 167.0, 209.0, 247.1, 265.0										[19]	Zhang, 2008
		angelone		Iridoid	904293-35-2	C9H8O4	181.05	203.032	180.04220 [M]+ 43 (64.09), 51 (19.83), 71 (5.33), 79 (24.68), 94 (4.67), 109 (21.17), 122 (55.29), 124 (16.44), 135 (22.28), 150 (18.91), 152 (24.10), 165 (51.77), 180 (100.00)										[19]	Mulholland, 2006
		swertiakoulactone			1399772-59-8	C10H10O4	195.066	217.048	195.0654 [M+H]+									338 (3.6), 261 (3.8) nm	[19]	He, 2011
		(±)-gentiolactone		Iridoid	65853-15-8	C10H12O5	213.076	235.058	212.0685 [M]+ 139 (100), 168 (66), 183 (15), 212 (0.3)									206 (3.78), 222 (3.76)	[19]	Kakuda, 2003; results for S-(+)
		naucledal		Iridoid	38965-50-3	C10H12O4	197.081	219.063	39 (89), 41 (100), 43 (56), 53 (49), 55 (45), 67 (44), 69 (55), 77 (28), 79 (41), 81 (50), 91 (26), 93 (22), 95 (37), 97 (31), 98 (24), 105 (11), 108 (15), 109 (23), 111 (21), 121 (22), 122 (12), 123 (14), 124 (12), 125 (20), 126 (11), 127 (17), 135 (10), 137 (10), 139 (30), 140 (10), 141 (12),149 (12), 150 (12), 151 (10), 152 (20), 153 (10), 165(12), 167 (38), 168 (8), 169 (8), 170 (10), 178 (29…										[19]	McLean, 1972; Chai, 2010
		4-(3,4)dimethoxyphenyl)tetrahydrofuro[3,4-c]furan-1-one																	[19]	reference not found
		salicifoliol		Lignan	125564-65-0	C13H14O5	249.076	273.074	250.0842 [M]+ 152 (100), 165 (39), 191 (7), 233 (9), 235 (4)										[19]	Gonzalez, 1989
		(+)-eudesmin		Lignan	29106-36-3	C22H26O6	387.181	409.163	386 [M]+ 165, 177, 189, 219			385.165				385.1656 [M-H]-		232, 279	[19]	Iida, 1982; Atal, 1967; Miyaushi, 1997
		monomethylpinoresinol		Lignanoid	29395-87-7	C21H24O6	373.165	395.147	372 [M]+ 137, 151, 165, 177, 205, 219										[19,20]	Miyaushi, 1997
		5-hydroxymethylisochromen-1-one			124236-50-6	C10H8O3	177.055	199.037	91 (34), 120 (25), 119 (38), 148 (51), 176 (100)									243, 265, 317 (sh)	[19]	El-Sedawy, 1989b
		(+)-glaberide I		Lignan	77790-52-4	C14H16O6	281.103	303.084											[19]
		Erythricin (5-hydroxymethylisochroman-1-one)			99058-99-8	C10H10O3	179.071	201.053	91 (4), 104 (29), 120(42), 132 (96, M-H2O-CO), 160 (100, M-H2O), 178 (23, [M]+)										[19]	El-Sedawy, 1989a
		(+)-medioresinol		Lignan	40957-99-1	C21H24O7	389.16	411.142		389.1594 [M+H]+								232 (4.31), 280 (3.76)	[19,20]	Ando, 2007
		syringaresinol		Lignan	487-35-4	C22H26O8	419.171	441.152		419.1727 [M+H]+								237(4,18), 271 (3,43), 281 (3,30);	[19,20]	Lin-gen, 1982; Ando, 2007
		djalonenol		Terpenoid	170554-72-0	C10H16O4	201.113	223.095										242, 280	[19,20]	Onocha, 1985
Fagraea fragrans	leaves	gentianine		Alkaloid	439-89-4	C10H9NO2	176.071	198.053	90 (65), 117 (94, M-CO-CH2O), 147 (52, M-CO), 175 (100, M). (ESI?)									219 (4.41), 285 (3.14) / 218, 246 (sh), 284	[21]	El-Sedawy, 1989a
Fagraea racemosa	stem bark	fagraeoside	1	Alkaloid	1309603-12-0	C20H26N2O11	471.161	493.143				469.146	-	-	515.151	469.1468 [M-H]-		241 (3.53)	[43]
		(-)-secologanoside	2	Iridoid	59472-23-0	C16H22O11	391.124	413.106	413.2 [M+Na]+		[M]+ 390 413 [M+Na]+	389.108	411.09	194.051	435.114	_x0002_		230 (3.92) / 241 (3.53)	[43]	Calis, 1984
F blumei	stem bark	potalioside B	4	Phenol	883905-21-3	C20H30O13	479.176	501.158	501.1591 [M+Na]+									210 (4.19), 225 (sh,3.91), 270 (3.38)	[43]	Li, 2005
		adoxosidic acid	5	Iridoid	84375-46-2	C16H24O10	377.145	399.127				375.129				375 [M-H]- (TSP-MS)			[13,43]
		adoxoside	6	Iridoid	42830-26-2	C17H26O17	503.125	525.107											[43]
		loganic acid	9	Iridoid	22255-40-9	C16H24O10	377.145	399.127										232 (3.94)	[43]	Calis, 1984b
F. auriculata	stem bark	taxifolin-6-C-glucoside	11	Flavanonol	112494-39-0	C21H22O12	467.119	489.101										291 (4.29), 325 (sh, 3.61)	[43]	Mbafor, 1989
F ceilanica	stem bark	aromadendrin-6-C-glucoside	12	Flavanonol	112494-34-5	C21H22O11	451.124	473.106											[43]
13	Cuendet, M.; Hostettmann, K.; Potterat, O.; Dyatmiko, W. Iridoid Glucosides with Free Radical Scavenging Properties fromFagraea blumei. Helvetica Chimica Acta 1997, 80, 1144–1152, doi:10.1002/hlca.19970800411.
14	Cambie, R.C.; Lal, A.R.; Rickard, C.E.F.; Tanaka, N. Chemistry of Fijian Plants. V. : Constituents of Fagraea gracilipes A. GRAY. Chemical & Pharmaceutical Bulletin 1990, 38, 1857–1861, doi:10.1248/cpb.38.1857.
15	Ferdinal, N.; Alfajri, R.; Arifin, B. Isolation and Characterization of Scopoletin from The Bark of fagraea ceilanica thumb and Antioxidants Tests. International Journal on Advanced Science, Engineering and Information Technology 2015, 5, 126, doi:10.18517/ijaseit.5.2.504.
16	Bangprapai, A.; Thongphasuk, P.; Songsak, T. Determination of Swertiamarin Content by Tlc-Densitometer in Fagraea fragrans Roxb. Leaves. Bulletin of Health, Science and Technology 2016, 14, 13–18.
17	Jonville, M.-C.; Capel, M.; Frédérich, M.; Angenot, L.; Dive, G.; Faure, R.; Azas, N.; Ollivier, E. Fagraldehyde, a Secoiridoid Isolated from Fagraea fragrans. Journal of Natural Products 2008, 71, 2038–2040, doi:10.1021/np800291d.
18	Okuyama, E.; Suzumura, K.; Yamazaki, M. Pharmacologically Active Components of Todopon Puok (Fagraea racemosa), a Medicinal Plant from Borneo. Chem. Pharm. Bull. 1995, 43, 2200–2204, doi:10.1248/cpb.43.2200.
19	Madmanang, S.; Cheyeng, N.; Heembenmad, S.; Mahabusarakam, W.; Saising, J.; Seeger, M.; Chusri, S.; Chakthong, S. Constituents of Fagraea fragrans with Antimycobacterial Activity in Combination with Erythromycin. Journal of Natural Products 2016, 79, 767–774, doi:10.1021/acs.jnatprod.5b00691.
20	Rattanaburi, S.; Kaikaew, K.; Watanapokasin, R.; Phongpaichit, S.; Mahabusarakamb, W. A new lignan from the stem bark of Fagraea fragrans Roxb. Natural Product Research 2020, 1–6, doi:10.1080/14786419.2020.1821020.
21	Wan, A.S.C.; Chow, Y.L. Alkaloids of Fagraea fragrans Roxb. Journal of Pharmacy and Pharmacology 1964, 16, 484–486, doi:10.1111/j.2042-7158.1964.tb07497.x.
43	Suciati; Lambert, L.K.; Ross, B.P.; Deseo, M.A.; Garson, M.J. Phytochemical Study of Fagraea spp. Uncovers a New Terpene Alkaloid with Anti-Inflammatory Properties. Australian Journal of Chemistry 2011, 64, 489, doi:10.1071/CH10421.
	Ando, H.; Hirai, Y.; Fujii, M.; Hori, Y.; Fukumura, M.; Niiho, Y.; Nakajima, Y.; Shibata, T.; Toriizuka, K.; Ida, Y. The chemical constituents of fresh Gentian Root. J Nat Med 2007, 61, 269–279, doi:10.1007/s11418-007-0143-x.
	Calis, I.; Lahloub, M.F.; Sticher, O. Loganin, loganic acid and periclymenoside, a new biosidic ester iridoid glucoside fromLonicera periclymenumL. (Caprifoliaceae). Helv. Chim. Acta 1984, 67, 160–165, doi:10.1002/hlca.19840670119.
	Calis, I.; Sticher, O. Secoiridoid glucosides from Lonicera periclymenum. Phytochemistry 1984, 23, 2539–2540, doi:10.1016/S0031-9422(00)84094-7.
	Chai, X.; Su, Y.-F.; Zheng, Y.-H.; Yan, S.-L.; Zhang, X.; Gao, X.-M. Iridoids from the roots of Triosteum pinnatifidum. Biochemical Systematics and Ecology 2010, 38, 210–212, doi:10.1016/j.bse.2009.12.037.
	El-Sedawy, A.; Shu, Y.-Z.; Hattori, M.; Kobashi, K.; Namba, T. Metabolism of Swertiamarin from Swertia japonica by Human Intestinal Bacteria. Planta Med 1989, 55, 147–150, doi:10.1055/s-2006-961909.
	El-Sedawy, A.I.; Hattori, M.; Kobashi, K.; Namba, T. Metabolism of gentiopicroside (gentiopicrin) by human intestinal bacteria. Chem. Pharm. Bull. 1989, 37, 2435–2437, doi:10.1248/cpb.37.2435.
	González, A.G.; Estévez-Reyes, R.; Mato, C. Salicifoliol, a New Furolactone-Type Lignan from Bupleurum salicifolium. Journal of Natural Products 1989, 52, 1139–1142, doi:10.1021/np50065a037.
	He, K.; Ma, Y.-B.; Geng, C.-A.; Zhang, X.-M.; Cao, T.-W.; Jiang, F.-Q.; Chen, J.-J. Anti-hepatitis B virus active secoiridoids from Swertia kouitchensis. Natural Products and Bioprospecting 2011, 1, 48–51, doi:10.1007/s13659-011-0009-5.
	Iida, T.; Nakano, M.; Ito, K. Hydroperoxysesquiterpene and lignan constituents of Magnolia kobus. Phytochemistry 1982, 21, 673–675, doi:10.1016/0031-9422(82)83163-4.
	Islam, Md.S.; Ishigami, K.; Watanabe, H. Synthesis of (−)-mellein, (+)-ramulosin, and related natural products. Tetrahedron 2007, 63, 1074–1079, doi:10.1016/j.tet.2006.11.068.
	Kakuda, R.; Machida, K.; Yaoita, Y.; Kikuchi, M.; Kikuchi, M. Studies on the Constituents of Gentiana Species. II. A New Triterpenoid, and (S)-(+)- and (R)-(−)-Gentiolactones from Gentiana lutea. Chem. Pharm. Bull. 2003, 51, 885–887, doi:10.1248/cpb.51.885.
	Kwon, H.C.; Lee, K.R. Phytochemical constituents ofArtemisia japonica ssp.littoricola. Archives of Pharmacal Research 2001, 24, 194–197, doi:10.1007/BF02978255.
	Li, X.-C.; ElSohly, H.N.; Walker, L.A.; Clark, A.M. Phenolic Glycosides from Potalia amara. Planta med 2005, 71, 977–979, doi:10.1055/s-2005-871233.
	Lin-gen, Z.; Seligmann, O.; Jurcic, K.; Wagner, H. Inhaltsstoffe von Daphne tangutica. Planta Med 1982, 45, 172–176, doi:10.1055/s-2007-971368.
	Mbafor, J.T.; Fomum, Z.T.; Promsattha, R.; Sanson, D.R.; Tempesta, M.S. Isolation and Characterization of Taxifolin 6-C-glucoside from Garcinia epunctata. J. Nat. Prod. 1989, 52, 417–419, doi:10.1021/np50062a039.
	McLean, S.; Murray, D.G. The Constituents of Nauclea diderrichii . Part IV. Miscellaneous Substances; Biogenetic Considerations. Can. J. Chem. 1972, 50, 1496–1501, doi:10.1139/v72-237.
	Miyauchi, T.; Ozawa, S. Formation of (+)-eudesmin in Magnolia kobus DC. Var. borealis sarg. Phytochemistry 1998, 47, 665–670, doi:10.1016/S0031-9422(97)00458-5.
	Mulholland, D.A.; Langlois, A.; Randrianarivelojosia, M.; Derat, E.; Nuzillard, J.-M. The structural elucidation of a novel iridoid derivative fromTachiadenus longiflorus (Gentianaceae) using the LSD programme and quantum chemical computations. Phytochem. Anal. 2006, 17, 87–90, doi:10.1002/pca.890.
	Onocha, P.; Okorie, D.A.; Connolly, J.D.; Roycroft, D.S. Monoterpene diol, iridoid glucoside and dibenzo-α-pyrone from Anthocleista djalonensis. Phytochemistry 1995, 40, 1183–1189, doi:10.1016/0031-9422(95)00121-M.
	Pettit, G.R.; Melody, N.; Thornhill, A.; Knight, J.C.; Groy, T.L.; Herald, C.L. Antineoplastic Agents. 579. Synthesis and Cancer Cell Growth Evaluation of E -Stilstatin 3: A Resveratrol Structural Modification ⊥. J. Nat. Prod. 2009, 72, 1637–1642, doi:10.1021/np9002146.
	Wang, C.L.; Liu, J.L.; Liu, Z.L.; Li, X.S.; Cao, X.Y. Biomimetic transformation of gentiopicroside to erythrocentaurin. Chinese Chemical Letters 2009, 20, 150–152, doi:10.1016/j.cclet.2008.10.051.
	Wang, H.-L.; Geng, C.-A.; Ma, Y.-B.; Zhang, X.-M.; Chen, J.-J. Three new secoiridoids, swermacrolactones A–C and anti-hepatitis B virus activity from Swertia macrosperma. Fitoterapia 2013, 89, 183–187, doi:10.1016/j.fitote.2013.06.002.
	Zhang, W.; Krohn, K.; Draeger, S.; Schulz, B. Bioactive Isocoumarins Isolated from the Endophytic Fungus Microdochium bolleyi. J. Nat. Prod. 2008, 71, 1078–1081, doi:10.1021/np800095g.
